# Supplementary material for: Spontaneously polarized lithium-doped zinc oxide nanowires as photoanodes for electrical water splitting
Source: Royal Society of Chemistry journal article supplement (doi:10.1039/c5ta09795a), 2016-01-01
Supplement: c5ta09795a1.pdf [file c5ta09795a1.pdf]

## Supporting Informations

# Spontaneously Polarized Lithium-Doped Zinc Oxide Nanowires as Photoanode for Electrical Water Splitting

Hyun Joo Lee<sup>1,†</sup>, Sung-Ho Shin<sup>2,†</sup>, Ki Tae Nam,<sup>3</sup> Junghyo Nah<sup>2,\*</sup>, Min Hyung Lee<sup>1,\*</sup>

<sup>1</sup>*Department of Applied Chemistry, Kyung Hee University, Yongin, Gyeonggi, 17104, Korea.*

<sup>2</sup>*Department of Electrical Engineering, Chungnam National University, Daejeon, 34134, Korea.*

<sup>3</sup>*Department of Material Science and Engineering, Seoul National University, Seoul, 08826, Korea.*

† These authors are contributed equally.

\*Corresponding authors: [jnah@cnu.ac.kr](mailto:jnah@cnu.ac.kr), [minhlee@khu.ac.kr](mailto:minhlee@khu.ac.kr)

**Table S1. Bandgap of Li-doped ZnO NWs with different polarization.**

| Sample           | $E_g$ (eV) |
|------------------|------------|
| Unpoled          | 3.23       |
| Positively poled | 3.24       |
| Negatively poled | 3.13       |

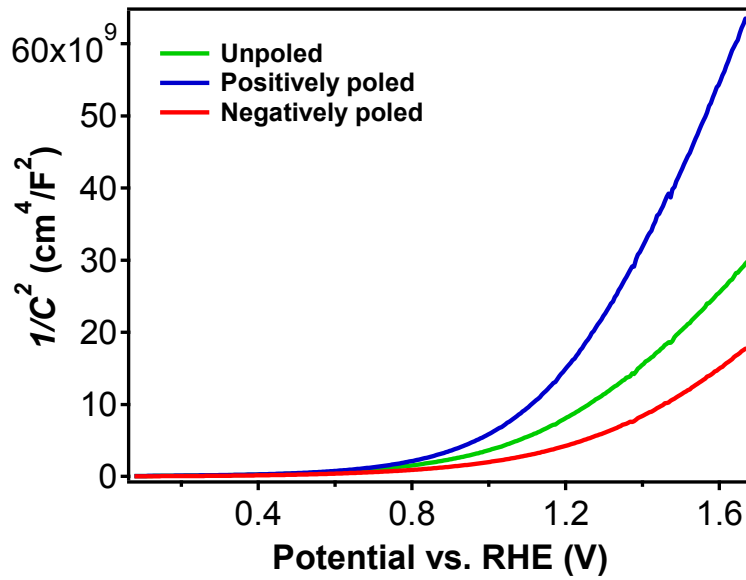

**Figure S1.** Mott-Schottky plots of Li-doped ZnO NW PECs in the dark at frequency of 1kHz.

**Table S2. Impedance parameters of Li-doped ZnO depending on poling condition**

| <b>Sample</b>           | <b><math>R_s</math> (<math>\Omega</math>)</b> | <b><math>C_{ZnO}</math> (F)</b> | <b><math>R_{CT}</math> (<math>\Omega</math>)</b> |
|-------------------------|-----------------------------------------------|---------------------------------|--------------------------------------------------|
| <b>Unpoled</b>          | 12.11                                         | $4.44 \times 10^{-5}$           | 50,080                                           |
| <b>Positively poled</b> | 6.759                                         | $2.17 \times 10^{-5}$           | 33,702                                           |
| <b>Negatively poled</b> | 12.8                                          | $2.52 \times 10^{-5}$           | 100,100                                          |
